# Supplementary figures and images for: Adsorption Capacities of Hygroscopic Materials Based on NaCl-TiO2 and NaCl-SiO2 Core/Shell Particles
Source: Hindawi journal article supplement (doi:10.1155/2020/3683629), 2020-02-13

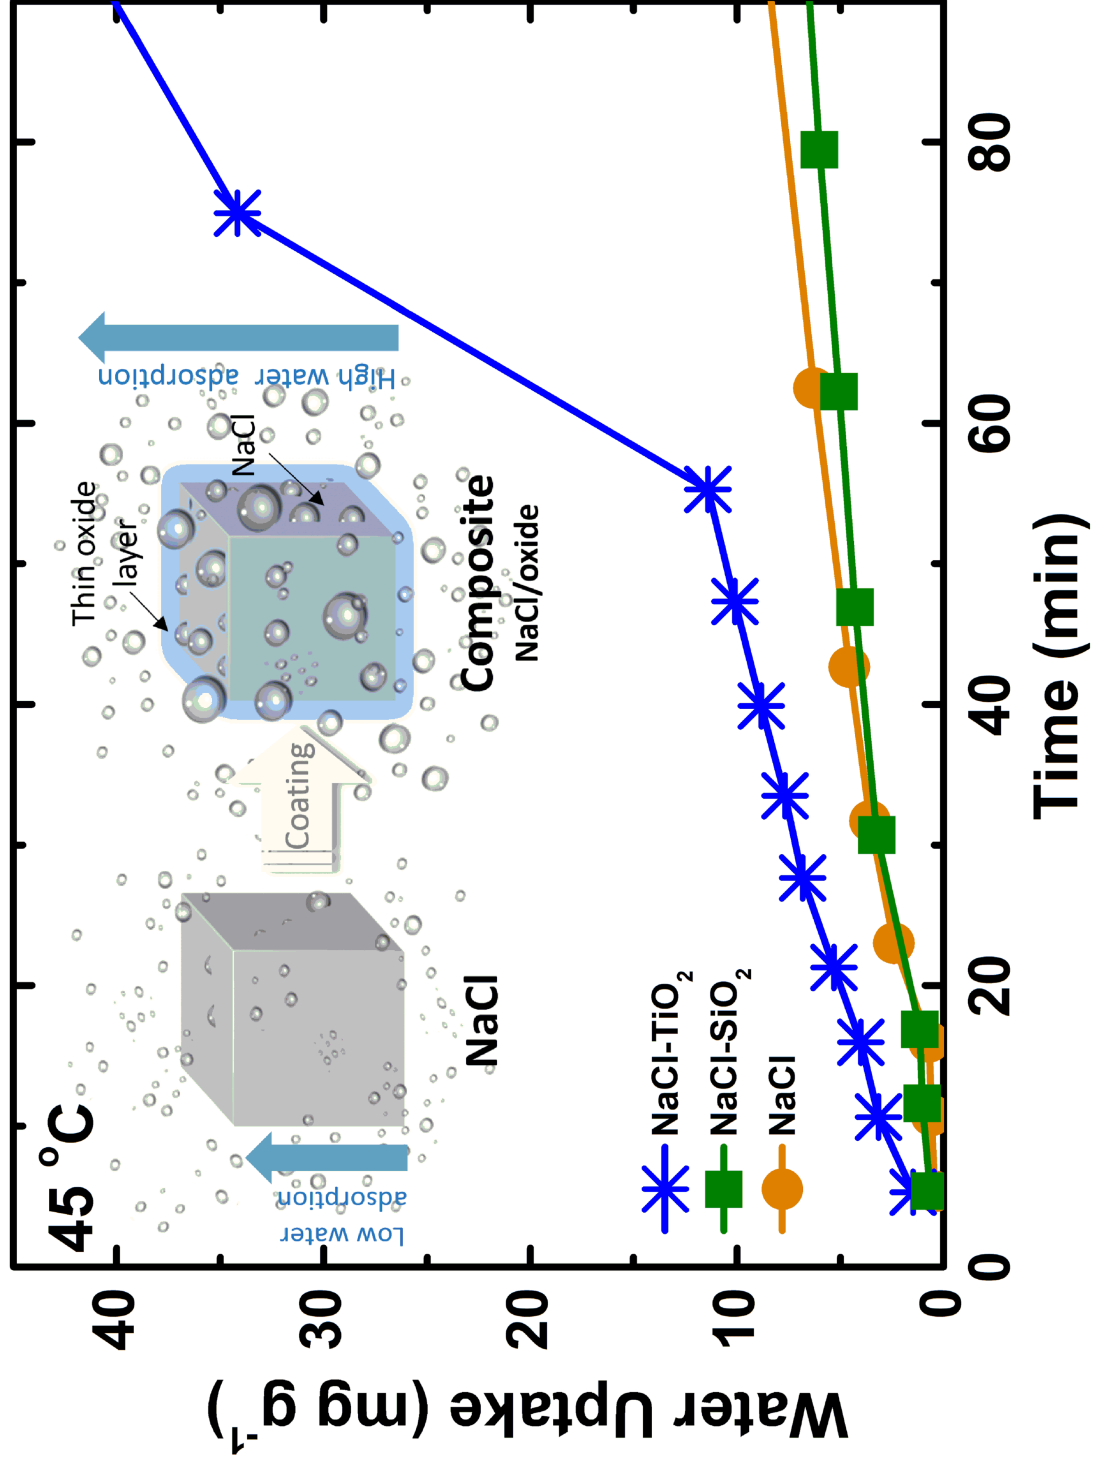

Supplement: f1 [file 3683629.f1.pdf]
